# Supplementary material for: What Constitutes Adequate Control of High Blood Pressure? Current Considerations
Source: PubMed Central journal article supplement — Mayo Clin Proc Innov Qual Outcomes. 2024 Jul 4;8(4):384–95. doi: 10.1016/j.mayocpiqo.2024.06.001 (PMC11283018; doi:10.1016/j.mayocpiqo.2024.06.001), 2024-07-04
Supplement: mmc4.pdf [file mmc4.pdf]

**From:** [Permissions Helpdesk](#)  
**To:** [don.casey@ipo4health.com](mailto:don.casey@ipo4health.com)  
**Subject:** Re: Requesting Permission for reuse in a journal/magazine [240322-005407]  
**Date:** Friday, March 22, 2024 2:41:22 AM

---

Dear Donald Casey,

Thank you for contacting us.

Please note that as one of the Authors of this article, you retain the right to prepare other derivative works, or to otherwise re-use portions or excerpts in other works, with full acknowledgement of its original publication in the journal.

For full details of your rights as a Journal Author, please visit [Policies and ethics](#).

Please feel free to contact me if you have any queries.

Kind regards,

**Thomas Rexson Yesudoss**  
Copyrights Specialist  
**ELSEVIER** | HCM - Health Content Management

Visit [Elsevier Permissions](#)

---

**From:** Administrator  
**Date:** Thursday, March 21, 2024 08:48 PM GMT

Dear Customer

Thank you for contacting Elsevier's Permissions Helpdesk.

This is an automated acknowledgement to confirm we have received your query. Ticket number 240322-005407 has been opened on your behalf and we aim to respond within two business days.

Regards,

Permissions Helpdesk

---

**From:** Donald Casey

**Date:** Thursday, March 21, 2024 08:48 PM GMT

I am requesting permission for reuse of the attached pages from the document listed below for a new manuscript to be submitted to Mayo Clinic Proceedings: Innovations, Quality & Outcomes.

---

This email is for use by the intended recipient and contains information that may be confidential. If you are not the intended recipient, please notify the sender by return email and delete this email from your inbox. Any unauthorized use or distribution of this email, in whole or in part, is strictly prohibited and may be unlawful. Any price quotes contained in this email are merely indicative and will not result in any legally binding or enforceable obligation. Unless explicitly designated as an intended e-contract, this email does not constitute a contract offer, a contract amendment, or an acceptance of a contract offer.

Elsevier Limited. Registered Office: 125 London Wall, London, EC2Y 5AS, Registration No. 1982084, Registered in England and Wales. [Privacy Policy](#)

---
